# Supplementary material for: Applying the intervention Complexity Assessment Tool to brief interventions targeting long-term benzodiazepine receptor agonist use in primary care: Lessons learned
Source: Springer Nature journal article supplement (doi:10.1186/s12875-022-01775-y), 2022-07-16
Supplement: MOESM1 [file 23274938]

## Additional File 1: Data extraction form

Study ID:

Study title:

| Study and Intervention details                                                                                                                                   |                                               |                                                                                                                                                                   |                       |
|------------------------------------------------------------------------------------------------------------------------------------------------------------------|-----------------------------------------------|-------------------------------------------------------------------------------------------------------------------------------------------------------------------|-----------------------|
| Study aims/objectives                                                                                                                                            |                                               |                                                                                                                                                                   |                       |
| Study outcome(s)                                                                                                                                                 |                                               |                                                                                                                                                                   |                       |
| Details of intervention/s and the comparison (including usual care)                                                                                              |                                               |                                                                                                                                                                   |                       |
| Intervention aim/objectives                                                                                                                                      |                                               |                                                                                                                                                                   |                       |
| Intervention deliverer                                                                                                                                           |                                               |                                                                                                                                                                   |                       |
| Intervention target/recipient (which may include individuals, groups of individuals and other entities)                                                          |                                               |                                                                                                                                                                   |                       |
| Target behaviour and component actions (i.e. whose behaviour the intervention intended to change and what were the component actions involved in that behaviour) |                                               |                                                                                                                                                                   |                       |
| Core dimension                                                                                                                                                   | Description of the intervention in the review | Judgement                                                                                                                                                         | Support for judgement |
| <b>1. Organisational levels and categories targeted by the intervention</b>                                                                                      |                                               | <ul style="list-style-type: none"> <li>– Multi-level</li> <li>– Multi-category</li> <li>– Single category</li> </ul>                                              |                       |
| <b>2. Behaviour or actions of intervention recipients or participants to which the intervention is directed</b>                                                  |                                               | <ul style="list-style-type: none"> <li>– Multi-target</li> <li>– Dual target</li> <li>– Single target</li> <li>– Varies</li> </ul>                                |                       |
| <b>3. Active components included in the intervention, in relation to the comparison</b>                                                                          |                                               | <ul style="list-style-type: none"> <li>– More than one component and delivered as a bundle</li> <li>– More than one component</li> <li>– One component</li> </ul> |                       |
| <b>4. The degree of tailoring intended or flexibility permitted across sites or individuals in applying or implementing the intervention</b>                     |                                               | <ul style="list-style-type: none"> <li>– Highly tailored/flexible</li> <li>– Moderately tailored/flexible</li> </ul>                                              |                       |

|                                                                                                                                                                                  |                                                      |                                                                                                                                                                                                              |                              |
|----------------------------------------------------------------------------------------------------------------------------------------------------------------------------------|------------------------------------------------------|--------------------------------------------------------------------------------------------------------------------------------------------------------------------------------------------------------------|------------------------------|
|                                                                                                                                                                                  |                                                      | <ul style="list-style-type: none"> <li>- Inflexible</li> <li>- Varies</li> </ul>                                                                                                                             |                              |
| 5. The level of skill required by those delivering the intervention in order to meet the intervention's objectives                                                               |                                                      | <ul style="list-style-type: none"> <li>- High level skills</li> <li>- Intermediate level skills</li> <li>- Basic skills</li> <li>- Varies</li> </ul>                                                         |                              |
| 6. The level of skill required for the targeted behaviour when entering the included studies by those receiving the intervention, in order to meet the intervention's objectives |                                                      | <ul style="list-style-type: none"> <li>- High level skills</li> <li>- Intermediate level skills</li> <li>- Basic skills</li> <li>- Varies</li> </ul>                                                         |                              |
| <b>Optional dimension</b>                                                                                                                                                        | <b>Description of the intervention in the review</b> | <b>Judgement</b>                                                                                                                                                                                             | <b>Support for judgement</b> |
| 7. The degree of interaction between intervention components, including the independence / interdependence of intervention components                                            |                                                      | <ul style="list-style-type: none"> <li>- High level interaction</li> <li>- Moderate interaction</li> <li>- Independent</li> <li>- Varies</li> <li>- Unclear/Unable to assess</li> </ul>                      |                              |
| 8. The degree to which the effects of the intervention are dependent on the context or setting in which it is implemented                                                        |                                                      | <ul style="list-style-type: none"> <li>- Highly context dependent</li> <li>- Moderately context dependent</li> <li>- Independent of context</li> <li>- Varies</li> <li>- Unclear/Unable to assess</li> </ul> |                              |
| 9. The degree to which the effects of the intervention are modified by recipient or provider factors                                                                             |                                                      | <ul style="list-style-type: none"> <li>- Highly dependent on individual-level factors</li> <li>- Moderately dependent on individual-level</li> </ul>                                                         |                              |

|                                                                                                                      |  |                                                                                                                                                                                                   |  |
|----------------------------------------------------------------------------------------------------------------------|--|---------------------------------------------------------------------------------------------------------------------------------------------------------------------------------------------------|--|
|                                                                                                                      |  | <p>factors</p> <ul style="list-style-type: none"> <li>- Largely independent of individual-level factors</li> <li>- Varies</li> <li>- Unclear/Unable to assess</li> </ul>                          |  |
| <p><b>10. The nature of the causal pathway between the intervention and the outcome it is intended to effect</b></p> |  | <ul style="list-style-type: none"> <li>- Pathway variable, long</li> <li>- Pathway linear, long</li> <li>- Pathway linear, short</li> <li>- Varies</li> <li>- Unclear/Unable to assess</li> </ul> |  |
